# Supplementary material for: Risk Stratification, Measurable Residual Disease, and Outcomes of AML Patients with a Trisomy 8 Undergoing Allogeneic Hematopoietic Stem Cell Transplantation
Source: MDPI journal article supplement (doi:10.3390/cancers13225679), 2021-11-13
Supplement: s1 [file s1]

## **Supplementary Material to Backhaus *et al.***

### **Risk stratification, measurable residual disease, and outcomes of AML patients with a trisomy 8 undergoing allogeneic hematopoietic stem cell transplantation**

#### **Further genetic and HSCT related information**

Additional information on the surface antigen of myeloid blasts at diagnosis of acute myeloid leukemia (AML) is shown in Supplementary Table S2.

#### **Induction therapies**

The majority of AML patients received standard Cytarabine-based induction protocols, *i.e.* with conventional 7+3 (n=128), conventional 7+3 with Midostaurin (n=5), CPX-351 (n=14)[1] or sequential Azacytidine and OSO induction (n=50); were treated within or according to the OSO studies (#061[2] or #069,[3] under or over 60 years, n=428), the Ratify Trial (n=8),[4] the Unify Trial (ClinicalTrials.gov Identifier: NCT03512197, n=8) or the Quantum first trial (NCT02668653, n=6) and two patients were diagnosed with AML as children and treated within the AML BFM-2014 study.[5] Ten patients received Azacytidine alone.

#### **Allogeneic HSCT in the primary patient set**

Non-myeloablative (NMA) conditioning consisted of 3x30 mg/m<sup>2</sup> Fludarabine followed by 2 or 3 Gy total body irradiation (TBI).[6] Myeloablative conditioning (MAC) consisting of either 2x60 mg/kg body weight cyclophosphamide and 12 Gy TBI or 5x30 mg/m<sup>2</sup> Fludarabine and 8 Gy TBI. Reduced intensity conditioning (RIC) consisted of either busulfan (8 mg/kg orally or 6.4 mg/kg intravenously) and 5x30 mg<sup>2</sup> Fludarabine,[7] Fludarabine and Melphalan (n=2),[8] Fludarabine, Thiothepa, and Melphalan[9] or FLAMSA-based conditioning.[10]

For prevention of graft-versus-host disease (GvHD), all patients received an intravenous starting dose of 5 mg/kg body weight Cyclosporine A in two daily doses from day -1 which was adjusted to a whole-

blood target level of 120-150 ng/ml for patients receiving FLAMSA conditioning or 200 ng/ml for all others.

Patients undergoing NMA-HSCT additionally received Mycophenolate Mofetil 3 g per day in three daily doses in case of unrelated HSCT or 2 g per day in two daily doses in case of related HSCT. None of the patients undergoing NMA-HSCT received *in vivo* T-cell depletion.

Patients receiving FLAMSA conditioning additionally received 2 g Mycophenolate Mofetil per day, which was stopped at day 28. Patients transplanted after RIC or MAC additionally received Methotrexate 15 mg intravenously on days +1, +3, +6, and +11 after HSCT, and RIC and MAC patients transplanted from an unrelated donor additionally received *in vivo* T-cell depletion with Thymoglobulin 2 mg/kg per day for three days. Cyclosporine A was reduced starting on day +42 and stopped on day 120 following FLAMSA conditioning and for all others reduced starting on day +84 or day +180 following related or unrelated HSCT, respectively. After NMA conditioning, Mycophenolate Mofetil was stopped at day +28 following related HSCT and tapered from days +40 to +96 following unrelated HSCT. Patients were evaluated for incidence of acute GvHD and chronic GvHD using established criteria of the Glucksberg grading system.[11] Immunosuppression was prolonged or extended with systemic steroids in cases of GvHD (grade > 2 according to Glucksberg grading system).[11] Requirement for acute GvHD was engraftment while requirement for chronic GvHD was engraftment and survival for at least 100 days after HSCT.

### **Definition of complete remission**

Complete remission (CR) was defined as the presence of <5% of blasts in bone marrow (BM), neutrophils  $>1.0 \times 10^9/L$ , platelets  $>100 \times 10^9/L$ , absence of blasts with Auer rods, independence of blood transfusion and no extramedullary disease.[12] CR with incomplete peripheral recovery (CRi) was defined as CR with platelets  $<100 \times 10^9/L$  or neutrophils  $<1.0 \times 10^9/L$ . The presence of CR or CRi was confirmed within 28 days prior to HSCT by bone marrow and peripheral blood analysis.

## Multivariate Analyses

Multivariable proportional hazard models were constructed for CIR and OS to evaluate the prognostic impact of the presence of no, a sole trisomy 8 or a trisomy 8 with additional genetic aberrations in AML patients undergoing allogeneic HSCT by backward adjusting for other variables. The following variables were considered for multivariable analyses: sex, disease origin (*de novo* vs secondary), ELN2017 risk, age at HSCT (< vs > 60 years), disease status at HSCT (morphologic remission vs active disease), the MRD status at HSCT (MRD<sup>neg</sup> vs MRD<sup>pos</sup>), the HCT-CI risk score (0 vs 1/2 vs 3 or more points), performance status at HSCT (ECOG), cytomegalovirus (CMV) status of recipient and donor (high-risk [+/-] vs all others), donor type (matched related vs matched unrelated vs mismatched unrelated), sex of the donor (female into male vs all others) and the conditioning intensity (myeloablative vs reduced-intensity vs non-myeloablative). Of these, variables significant at  $\alpha=.10$  in univariable analyses were considered for multivariable analyses. For all endpoints, hazard/odds ratios with their corresponding 95% confidence intervals are indicated for every significant prognostic factor of the final model.

In the multivariate analysis of the whole patient cohort, the ELN2017 genetic risk at diagnosis as well as the MRD status at HSCT were significant factors for the CIR, while the ELN2017 genetic risk at diagnosis, patient age at HSCT, the presence of a morphologic remission as well as the MRD status at HSCT significantly impacted OS (Supplementary Table S3).

## References

1. Lancet, J.E.; Uy, G.L.; Cortes, J.E.; Newell, L.F.; Lin, T.L.; Ritchie, E.K.; Stuart, R.K.; Strickland, S.A.; Hogge, D.; Solomon, S.R.; et al. Cpx-351 (cytarabine and daunorubicin) liposome for injection versus conventional cytarabine plus daunorubicin in older patients with newly diagnosed secondary acute myeloid leukemia. *J. Clin. Oncol.* **2018**, *36*, 2684–2692, doi:10.1200/JCO.2017.77.6112.
2. Büchner, T.; Schlenk, R.F.; Schaich, M.; Döhner, K.; Krah, R.; Krauter, J.; Heil, G.; Krug, U.; Sauerland, M.C.; Heinecke, A.; et al. Acute Myeloid Leukemia (AML): Different treatment strategies versus a common standard arm - Combined prospective analysis by the German AML Intergroup. *J. Clin. Oncol.* **2012**, *30*, 3604–3610, doi:10.1200/JCO.2012.42.2907.
3. Niederwieser, D.; Hoffmann, V.S.; Pfirrmann, M.; Al-Ali, H.K.; Schwind, S.; Vucinic, V.; Krah, R.; Kahl, C.; Wolf, H.-H.; Kreibich, U.; et al. Comparison of Treatment Strategies in Patients over 60 Years with AML: Final Analysis of a Prospective Randomized German AML Intergroup Study. [abstract]. In Proceedings of the Blood; 2016; Vol. 128, p. 1066.
4. Stone, R.M.; Mandrekar, S.J.; Sanford, B.L.; Laumann, K.; Geyer, S.; Bloomfield, C.D.; Thiede, C.; Prior, T.W.; Dohner, K.; Marcucci, G.; et al. Midostaurin plus chemotherapy for acute myeloid leukemia with a FLT3 Mutation. *N. Engl. J. Med.* **2017**, *377*, 454–464, doi:10.1056/NEJMoa1614359.
5. Creutzig, U.; Zimmermann, M.; Bourquin, J.P.; Dworzak, M.N.; Fleischhack, G.; Graf, N.; Klingebiel, T.; Kremens, B.; Lehrnbecher, T.; Von Neuhoff, C.; et al. Randomized trial comparing liposomal daunorubicin with idarubicin as induction for pediatric acute myeloid leukemia: Results from study AML-BFM 2004. *Blood* **2013**, *122*, 37–43, doi:10.1182/blood-2013-02-484097.
6. McSweeney, P.A.; Niederwieser, D.; Shizuru, J.A.; Sandmaier, B.M.; Molina, A.J.; Maloney, D.G.; Chauncey, T.R.; Gooley, T.A.; Hegenbart, U.; Nash, R.A.; et al. Hematopoietic cell transplantation in older patients with hematologic malignancies: Replacing high-dose cytotoxic therapy with graft-versus-tumor effects. *Blood* **2001**, *97*, 3390–3400, doi:10.1182/blood.V97.11.3390.
7. Kröger, N.; Iacobelli, S.; Franke, G.N.; Platzbecker, U.; Uddin, R.; Hübel, K.; Scheid, C.; Weber, T.; Robin, M.; Stelljes, M.; et al. Dose-reduced versus standard conditioning followed by allogeneic stem-cell transplantation for patients with myelodysplastic syndrome: A prospective randomized phase III study of the EBMT (RICMAC Trial). *J. Clin. Oncol.* **2017**, *35*, 2157–2164, doi:10.1200/JCO.2016.70.7349.
8. Baron, F.; Labopin, M.; Peniket, A.; Jindra, P.; Afanasyev, B.; Sanz, M.A.; Deconinck, E.; Nagler, A.; Mohty, M. Reduced-intensity conditioning with fludarabine and busulfan versus fludarabine and melphalan for patients with acute myeloid leukemia: A report from the Acute Leukemia Working Party of the European Group for Blood and Marrow Transplantation. *Cancer* **2015**, *121*, 1048–1055, doi:10.1002/cncr.29163.
9. Duque-Afonso, J.; Ihorst, G.; Waterhouse, M.; Zeiser, R.; Wäsch, R.; Bertz, H.; Yücel, M.; Köhler, T.; Müller-Quernheim, J.; Marks, R.; et al. Comparison of reduced-toxicity conditioning protocols using fludarabine, melphalan combined with thiotepa or carmustine in allogeneic hematopoietic cell transplantation. *Bone Marrow Transplant.* **2020**, 1–11, doi:10.1038/s41409-020-0986-2.

10. Pfrepper, C.; Klink, A.; Behre, G.; Schenk, T.; Franke, G.-N.; Jentzsch, M.; Schwind, S.; Al-Ali, H.-K.; Hochhaus, A.; Niederwieser, D.; et al. Risk factors for outcome in refractory acute myeloid leukemia patients treated with a combination of fludarabine, cytarabine, and amsacrine followed by a reduced-intensity conditioning and allogeneic stem cell transplantation. *J. Cancer Res. Clin. Oncol.* **2016**, *142*, 317–324, doi:10.1007/s00432-015-2050-y.
11. Glucksberg, H.; Storb, R.; Fefer, A.; Buckner, C.D.; Neiman, P.E.; Clift, R.A.; Lerner, K.G.; Thomas, E.D. Clinical manifestations of graft-versus-host disease in human recipients of marrow from HL-A-matched sibling donors 1974, 295–304.
12. Döhner, H.; Estey, E.H.; Amadori, S.; Appelbaum, F.R.; Büchner, T.; Burnett, A.K.; Dombret, H.; Fenaux, P.; Grimwade, D.; Larson, R.A.; et al. Diagnosis and management of acute myeloid leukemia in adults: Recommendations from an international expert panel, on behalf of the European LeukemiaNet. *Blood* **2010**, *115*, 453–474, doi:10.1182/blood-2009-07-235358.

## Supplementary Tables

**Supplementary Table S1. Additional cytogenetic aberrations of AML patients harboring a trisomy 8 (n=48).**

| UPN | Karyotype at diagnosis                                                                                                                            |
|-----|---------------------------------------------------------------------------------------------------------------------------------------------------|
| 70  | 46,XX [21]<br>46,XX,del(7)(q22q35) [4]<br>47,XX,+8 [3]                                                                                            |
| 75  | 45,XY,der(5;17)(q12;q11),ins(6;?)(q12;?)-17,del(18q) [6]<br>46,XY,idem,+8 [15]<br>45,XY,der(3;?)(q11;?),der(5;17)(q12;q11),t(6;7)(q12;q31)del [4] |
| 108 | 46,XX,t(9;11)(p22;q23) [4]<br>51,XX,+8,+8,t(9;11)(p22;q23),+12,+16,+20 [15]<br>50,XX,+8,+8,t(9;11)(p22;q23),+12,der(13;21)(q10;q10),+16,+20 [26]  |
| 128 | 45,XX,del(5)(q21q34),der(6)t(6;14)(p22;q23),der(8)t(8;21)(q24;q?), +8,add(13q+),-14,-21 [16]<br>46,XX [12]                                        |
| 180 | 47,XX,del(5)(q14q34),+8 [23]<br>46,XX [2]                                                                                                         |
| 213 | 51,XY,+4,+8,+9,+19,+21 [12]<br>46,XY [13]                                                                                                         |
| 251 | 47,XX,+8.ish inv(16)(p13q22)(pcp16q sp) [19]<br>46,XX [5]                                                                                         |
| 261 | 48,XY,del(5)(q31q34),+8,+21 [13]<br>46,XY [12]                                                                                                    |
| 269 | 48,XY,+8,+13 [20]<br>46,XY [10]                                                                                                                   |
| 287 | 47,XY,del(7)(q21q36),+8 [15]<br>46,XY [10]                                                                                                        |
| 301 | 47,XX,+8,inv(16)(p13q22) [7]<br>48,XX,idem,+21 [18]; 46,XX [4]                                                                                    |
| 316 | 47,XX,+8,t(11;19)(q23;p13) [19]<br>46,XX [6]                                                                                                      |
| 384 | 46,X,-Y,t(1;8;21)(p13;q22;q22),+8 [30]                                                                                                            |
| 412 | 48,XY,+8,+21[3]<br>46,XY[27]                                                                                                                      |

|     |                                                                                                                                                                |
|-----|----------------------------------------------------------------------------------------------------------------------------------------------------------------|
| 417 | 46,XX,der(1)t(1;16)(?;?),der(1;7)(q10;p10),del(3)(q13),der(6)t(6;16)(p21;q10),+8,-16[19]<br>47,XX,der(1;7)(q10;p10),+8[10]<br>48,XX,der(1;7)(q10;p10),+8,+8[2] |
| 423 | 47,XY,+8,iso(17)(q10) [11]<br>46,XY,iso(17)(q10) [6]                                                                                                           |
| 439 | 47,XY,t(3;11)(p21;q23),+8 [28]<br>46,XY [2]                                                                                                                    |
| 469 | 52-53,XY,+Y,del(5)(q12q34),+6,del(7)(q?21q35),+8,+9,+19,+1-2 mar [5]<br>46,XY [8]                                                                              |
| 481 | 48,XY,+8,+11 [27]                                                                                                                                              |
| 498 | 47,XX,+8 [16]<br>47,XX,+11 [5]<br>46,XX [14]                                                                                                                   |
| 522 | 46,XY,del(20q)[16]<br>47,XY,+8,del(20q)[5]<br>47,XY,+8,del(13)(q14q21),del(20q)[9]<br>46,XY[2]                                                                 |
| 532 | 46,XX,del(7)(q21q36),del(20q)[4]<br>47,XX,del(7)(q21q36),+8,del(20q)[21]                                                                                       |
| 536 | 47,XY,+8,t(9;11)(p21;q23)[4]<br>46,XY [20]                                                                                                                     |
| 554 | 47,XX,t(6;21)(q15;q21),+der(6)t(6;21)(q15;q21) [23]<br>47,XX,t(6;21)(q15;q21),+8 [5]<br>46,XX [3]                                                              |
| 563 | 43-44,XX,-3,der(5;17)(p10;q10),-7,+8[cp12]<br>46,XX[10]                                                                                                        |
| 573 | 50,XY,+4+8+13+22[3]<br>46XY[22]                                                                                                                                |
| 581 | 49,XY,t(2;4;17;?)(p?;q?26;?;?),+8,+8,der(17)(?),der(21)(?),+mar[19]<br>46,XY [1]                                                                               |
| 584 | 47,XY,+8 [28]<br>47,XY,+8,del(20)(q12) [2]                                                                                                                     |
| 622 | 43-46,XY,del(5)(q14q34),-7,+8,dic(12;13)(p12;p11),der(15;16)(q10;p10),add(17)(p13),+0-3mar[cp22]<br>46,XY[8]                                                   |
| 652 | 47,XY,+8,ins(10;11)(p?;q?23q?23)[21]<br>46,XY[4]                                                                                                               |

|     |                                                                                                                                                                                                                                                                                                                                                                                                                                                                                                                                                                                                                                                                                                                                                                                                                                                                                                                                                                                                                                                                                                                                                                                                                                                                                                                                                                                                                                                                                                                   |
|-----|-------------------------------------------------------------------------------------------------------------------------------------------------------------------------------------------------------------------------------------------------------------------------------------------------------------------------------------------------------------------------------------------------------------------------------------------------------------------------------------------------------------------------------------------------------------------------------------------------------------------------------------------------------------------------------------------------------------------------------------------------------------------------------------------------------------------------------------------------------------------------------------------------------------------------------------------------------------------------------------------------------------------------------------------------------------------------------------------------------------------------------------------------------------------------------------------------------------------------------------------------------------------------------------------------------------------------------------------------------------------------------------------------------------------------------------------------------------------------------------------------------------------|
| 657 | 48,XY,+8,+22[22]<br>46,XX [3]                                                                                                                                                                                                                                                                                                                                                                                                                                                                                                                                                                                                                                                                                                                                                                                                                                                                                                                                                                                                                                                                                                                                                                                                                                                                                                                                                                                                                                                                                     |
| 701 | 46,XX [9]; 47,XX,+8 [6]<br>45,XX,-7 [4]                                                                                                                                                                                                                                                                                                                                                                                                                                                                                                                                                                                                                                                                                                                                                                                                                                                                                                                                                                                                                                                                                                                                                                                                                                                                                                                                                                                                                                                                           |
| 703 | 45,XY,der(1;7)(q10;p10) [22]<br>46,idem,+8 [6]<br>45,X,-Y [7]                                                                                                                                                                                                                                                                                                                                                                                                                                                                                                                                                                                                                                                                                                                                                                                                                                                                                                                                                                                                                                                                                                                                                                                                                                                                                                                                                                                                                                                     |
| 736 | 54-55,XX,+der(1)t(1;?)(q11;?)+2,del(5)(q14q34),+del(5)(q14q34),+8,+11,add(12)(p13), +13,+der(14)t(14;17)(q32;q11),-17,+21,+22,+mar[cp11]<br>54-55,XX,+der(1)t(1;?)(q11;?)+2, del(5)(q14q34),+del(5)(q14q34),+8,+11,add(12)(p13),+14,+21,+22,+mar[cp11]                                                                                                                                                                                                                                                                                                                                                                                                                                                                                                                                                                                                                                                                                                                                                                                                                                                                                                                                                                                                                                                                                                                                                                                                                                                            |
| 744 | 47,XY,+8,inv(16)(q22p13) [16]<br>46,XY [9]                                                                                                                                                                                                                                                                                                                                                                                                                                                                                                                                                                                                                                                                                                                                                                                                                                                                                                                                                                                                                                                                                                                                                                                                                                                                                                                                                                                                                                                                        |
| 765 | 47,XY,+8[8]/48,XY,+8,+21 [6]<br>46,XY [12]                                                                                                                                                                                                                                                                                                                                                                                                                                                                                                                                                                                                                                                                                                                                                                                                                                                                                                                                                                                                                                                                                                                                                                                                                                                                                                                                                                                                                                                                        |
| 772 | 47,XY,+8[13]/ 48,XY,+8,+11 [8]<br>46,XY [4]                                                                                                                                                                                                                                                                                                                                                                                                                                                                                                                                                                                                                                                                                                                                                                                                                                                                                                                                                                                                                                                                                                                                                                                                                                                                                                                                                                                                                                                                       |
| 782 | 46,XY,der(9)del(9)(q22q33)ins(9)(q?21p21p2?2),ins(10;11)(p1?2;q23q13),del(11)(q12q23) [8]<br>53,idem,+4,+6,+8,+der(9)del(9)(q22q33)ins(9)(q?21p21p2?2),+13,+20,+21 [3]<br>46,XY [7]                                                                                                                                                                                                                                                                                                                                                                                                                                                                                                                                                                                                                                                                                                                                                                                                                                                                                                                                                                                                                                                                                                                                                                                                                                                                                                                               |
| 788 | 47,XX,+8 [17]<br>45,XX,der(3)t(3;17)(q2?8;q?),der(17;20)(q10;p10) [5]<br>46,XX [9]                                                                                                                                                                                                                                                                                                                                                                                                                                                                                                                                                                                                                                                                                                                                                                                                                                                                                                                                                                                                                                                                                                                                                                                                                                                                                                                                                                                                                                |
| 791 | 45,XY,-7,t(3;10)(p14;q24),t(16;21)(p11;q22) [20]<br>46,idem,+8 [1] .ish+8(cen8x3,MYCx3) [3]                                                                                                                                                                                                                                                                                                                                                                                                                                                                                                                                                                                                                                                                                                                                                                                                                                                                                                                                                                                                                                                                                                                                                                                                                                                                                                                                                                                                                       |
| 803 | 47,XY,+8,t(13;17)(q14;q22) [12]<br>46,XY [18]                                                                                                                                                                                                                                                                                                                                                                                                                                                                                                                                                                                                                                                                                                                                                                                                                                                                                                                                                                                                                                                                                                                                                                                                                                                                                                                                                                                                                                                                     |
| 817 | 43,X,der(X)t(X;?)(p11;?),add(1q+),del(3)(q11q18),-4,del(5)(q13q34),der(7;8)(q11;q11),+8,der(8)t(8;?)(p11;?),der(9)t(?1;9)(p34;q?31),add(10p+),del(11)(p14p15),<br>der(11;16)(q11;q11),add(12p+),add(12q+),der(13)(?),-16,add(16q+),-17,-18,add(18q+), der(21;?)(q11;?),der(22;?)(q11;?),+2mar [cp10]<br>44,XX,del(5)(q13q34),der(7;17)(q11;q11),der(14;15)(q11;q11),der(16;?) (q?;?),-18,add(18p+),der(21;?)(q11;?),-22,+dmin [cp8]<br>43,XX,der(X;?17)(q11;q?11),der(2)t(2;9)(q1?3;q?22),der(3)?inv(3) (q?13q?27),del(5)(q13q34),der(7)t(7;15)(q32;q21),+8,der(?8)(8qtel->8q11::cen::10q11-<br>>10q2?4::?),der(15)del(15q21q2?6),-16,-17,-18[cp4]<br>44,XX,del(5)(q13q34),der(7;17)(q11;q11),der(12;14)(q11;q11),der(18;?)(q11;?),-19,-21,der(?22)t(22;?)(q11;?)[cp4]<br>40~43,XX,add(2p+),der(4)t(4;?)(q2?6;?),del(5)(q13q34),der(7;8)(q11;q11),-8,add(8p+),del(9)(q2?2q3?4),-10, add(10q+),add(11q+),12,add(12p+),<br>der(12;?16)(q11;p11),-14,-16,-17,der(17;19)(q11;q11),-18,-22,der(22)t(22;?)(q12;?), add(22p+),+mar[cp3]<br>42~43,XX,del(2)(q22q?35),der(4)t(4;?)(q2?6;?),+9,der(9;?)(p23;?),del(9)(q13q33),add(10q+),del(13)(q13q34),add(15q+),der(16;?)(p11;?),-16,-17,-<br>18,del(18)(q21q23),der(19)t(11;19)(q14;p11),-22,der(?22)t(22;?)(q11;?),+mar [cp3]<br>41,X,-X,der(2)del(2)(q22q?35)t(2;8)(q21;q23),der(3)?inv(3)(q?13q?27),del(5)(q13q34),del(6)(q2?3q2?6),t(7;12)(q21; q24),der(?8)(8qtel->8q11::cen::10q11-<br>>10q2?4::?),-10,add(16q+),der(?17)del(17)(p13),-18,-20,-21,add(22)(p+)[cp2] |



|     |                                                                                                                                                                                                                                      |
|-----|--------------------------------------------------------------------------------------------------------------------------------------------------------------------------------------------------------------------------------------|
|     | 43,XX, add(2p+),der(4)t(4;?)(q2?6;?),del(5)(q13q34),der(6)t(6;8)(p25;q21),-8,add(8p+),add(10q+),-12,add(16q+),-17,-18,+mar [2]<br>46,XX [2]                                                                                          |
| 821 | 45,XX,-5,?t(6;21)(p21;q22),del(12)(p13),-18,+mar [4]<br>46,idem,+8[2]<br>45,idem,+8,-11 [2]<br>48,idem,+8,der(11)(?),+2mar,1-2dmin [4]                                                                                               |
| 860 | 58,XY,+1,+2,+6,+8,+10,+11,+14,+16,+19,+21,+21,+22 [cp2]<br>46,XY [30]                                                                                                                                                                |
| 866 | 47,XX,der(1;7)(q10;p10),+8 [25]<br>46,XX [5]                                                                                                                                                                                         |
| 872 | 47,XX,+8 [2] .ish+8(RUNX1T1x3) [2]<br>46,XX [29]                                                                                                                                                                                     |
| 880 | 44-45,XY,add(2)(q2?6),-3,del(5)(q21q34),del(6)(q16q23),inv(7)(p15q35),+8,der(12)t(3;12)(?;q24),add(15)(q?21),add(17)(p12),add(21)(q2?1),-22 [4]<br>54,XY,+1,+4,del(5)(q21q34),+6,del(6)(q16q23),inv(7)(p15q35),+8,+11,+14,+21,+22[6] |

**Supplementary Table S2. Immunophenotype of AML patients undergoing allogeneic HSCT according to the presence or absence of a trisomy 8 with or without additional cytogenetic aberrations (n=659).**

|                                | no trisomy 8 present<br>(n=578) | trisomy 8 present<br>(n=81) | <i>P</i> | sole trisomy 8<br>(n=33) | trisomy 8 and additional<br>aberrations<br>(n=48) | <i>P</i> |
|--------------------------------|---------------------------------|-----------------------------|----------|--------------------------|---------------------------------------------------|----------|
| BM CD34 expression, %          |                                 |                             | .03      |                          |                                                   | .95      |
| Median                         | 24                              | 35                          |          | 27                       | 38                                                |          |
| range                          | 0-97                            | 0.2-90                      |          | 0.7-79                   | 0.2-90                                            |          |
| BM CD38 expression, %          |                                 |                             | .06      |                          |                                                   | .55      |
| Median                         | 72                              | 65                          |          | 65                       | 64                                                |          |
| Range                          | 0.5-98                          | 20-97                       |          | 20-89                    | 34-97                                             |          |
| BM CD117 expression, %         |                                 |                             | .80      |                          |                                                   | .40      |
| Median                         | 34                              | 35                          |          | 39                       | 33                                                |          |
| Range                          | 0-96                            | 0.5-93                      |          | 2.4-82                   | 0.5-93                                            |          |
| BM CD7 expression, %           |                                 |                             | .74      |                          |                                                   | .16      |
| Median                         | 17                              | 17                          |          | 17                       | 20                                                |          |
| Range                          | 1-96                            | 3-69                        |          | 3-39                     | 3-69                                              |          |
| BM CD56 expression, %          |                                 |                             | .56      |                          |                                                   | .19      |
| Median                         | 16.5                            | 14                          |          | 8                        | 14                                                |          |
| Range                          | 0.5-93                          | 1-91                        |          | 2-69                     | 2-87                                              |          |
| BM Glykophorin A expression, % |                                 |                             | .003     |                          |                                                   | .35      |
| Median                         | 10                              | 15                          |          | 16                       | 15                                                |          |
| Range                          | 0-90                            | 1-55                        |          | 3-52                     | 1-55                                              |          |
| BM CD2 expression, %           |                                 |                             | .14      |                          |                                                   | .40      |
| Median                         | 15                              | 16                          |          | 13                       | 18                                                |          |
| range                          | 1-97                            | 5-55                        |          | 5-45                     | 6-55                                              |          |
| BM CD11b expression, %         |                                 |                             | .21      |                          |                                                   | .03      |
| Median                         | 16                              | 11                          |          | 7                        | 13                                                |          |
| range                          | 0.5-97                          | 1-92                        |          | 1-41                     | 2-92                                              |          |
| BM CD13 expression, %          |                                 |                             | .33      |                          |                                                   | .79      |
| Median                         | 57                              | 52                          |          | 51                       | 54                                                |          |
| range                          | 0.5-97                          | 7-94                        |          | 7-94                     | 9-86                                              |          |
| BM CD33 expression, %          |                                 |                             | .01      |                          |                                                   | .008     |
| Median                         | 64                              | 50                          |          | 33                       | 59                                                |          |
| range                          | 1-98                            | 8-94                        |          | 8-90                     | 16-94                                             |          |

|                                                                 |        |        |      |        |        |      |
|-----------------------------------------------------------------|--------|--------|------|--------|--------|------|
| BM CD15 expression, %                                           |        |        | .19  |        |        | .02  |
| Median                                                          | 28     | 21     |      | 14     | 30     |      |
| range                                                           | 1-97   | 4-91   |      | 5-55   | 4-91   |      |
| BM CD65 expression, %                                           |        |        | .74  |        |        | .003 |
| Median                                                          | 17     | 14     |      | 9      | 24     |      |
| Range                                                           | 0.5-93 | 1-91   |      | 1-53   | 6-91   |      |
| BM CD14 expression, %                                           |        |        | .84  |        |        | .76  |
| Median                                                          | 2      | 3      |      | 3      | 3      |      |
| Range                                                           | 0.5-74 | 0.5-35 |      | 0.5-35 | 0.5-26 |      |
| BM CD64 expression, %                                           |        |        | .46  |        |        | .05  |
| Median                                                          | 15     | 13     |      | 9      | 15     |      |
| range                                                           | 0-98   | 1-91   |      | 1-47   | 1-91   |      |
| BM CD45 expression, %                                           |        |        | .002 |        |        | .30  |
| Median                                                          | 92     | 86     |      | 82     | 87     |      |
| Range                                                           | 6-100  | 29-99  |      | 40-99  | 29-99  |      |
| BM CD61 expression, %                                           |        |        | .08  |        |        | .45  |
| Median                                                          | 5      | 8      |      | 5      | 8      |      |
| Range                                                           | 0.5-72 | 0.5-34 |      | 0.5-22 | 0.5-34 |      |
| Abbreviations: BM, bone marrow; CD, cluster of differentiation. |        |        |      |        |        |      |

### **Supplementary Table S3. Multivariate analysis**

|                                                                          | Cumulative incidence of relapse/progression |       | Overall survival |       |
|--------------------------------------------------------------------------|---------------------------------------------|-------|------------------|-------|
|                                                                          | HR* (95% CI)                                | P     | OR** (95% CI)    | P     |
| ELN2017 genetic risk<br>(adverse vs intermediate vs favorable)           | 1.82 (1.46-2.27)                            | <.001 | 0.63 (0.51-0.78) | <.001 |
| Age at HSCT<br>(> vs < 60 years)                                         | -                                           | -     | 0.55 (0.40-0.75) | <.001 |
| Morphologic remission at HSCT<br>(absent vs present)                     | -                                           | -     | 0.56 (0.36-0.86) | .008  |
| Pre-HSCT remission status<br>(MRD <sup>pos</sup> vs MRD <sup>neg</sup> ) | 2.44 (1.75-3.39)                            | <.001 | 0.68 (0.49-0.94) | .02   |

*Abbreviations: CI, confidence interval; ELN2017, European LeukemiaNet 2017; HSCT, hematopoietic stem cell transplantation; MRD, measurable residual disease.*

\*HR, hazard ratio, <1 (>1) indicate lower (higher) risk of relapse for the first category listed for the dichotomous variables for the lower (higher) values of the continuous variables.

\*\*OR, odds ratio, <1 (>1) indicate lower (higher) chance of survival for the first category listed for the dichotomous variables.

Variables considered in the models were those significant at  $\alpha=0.10$  in univariate analyses. For CIR endpoint, variables considered were: ELN2017 genetic risk group, conditioning regimen (NMA vs RIC vs MAC), morphologic remission status at HSCT (absent vs present), pre-HSCT remission status (MRD<sup>pos</sup> vs MRD<sup>neg</sup>), and age at HSCT. For OS endpoint, variables considered were: disease origin (secondary or therapy-related vs *de novo*), ELN2017 genetic risk group, donor type (matched related vs matched unrelated vs mismatched unrelated), conditioning regimen (NMA vs RIC vs MAC), morphologic remission status at HSCT (absent vs present), pre-HSCT remission status (MRD<sup>pos</sup> vs MRD<sup>neg</sup>), and age at HSCT.

**Supplementary Table S4. MRD test results of the single analyzed MRD markers in AML patients undergoing allogeneic HSCT according to the presence or absence of a trisomy 8.**

|                                                                                                                                                                                                               | no trisomy 8 present<br>(n=578) | trisomy 8 present<br>(n=81) | <i>P</i> |
|---------------------------------------------------------------------------------------------------------------------------------------------------------------------------------------------------------------|---------------------------------|-----------------------------|----------|
| Mutation-based MRD, n (%)                                                                                                                                                                                     |                                 |                             | 1        |
| negative                                                                                                                                                                                                      | 52 (44)                         | 9 (64)                      |          |
| positive                                                                                                                                                                                                      | 67 (56)                         | 5 (36)                      |          |
| <i>BAALC/ABL1</i> expression MRD, n (%)                                                                                                                                                                       |                                 |                             | .33      |
| negative                                                                                                                                                                                                      | 167 (71)                        | 22 (63)                     |          |
| positive                                                                                                                                                                                                      | 68 (29)                         | 13 (37)                     |          |
| <i>MN1/ABL1</i> expression MRD, n (%)                                                                                                                                                                         |                                 |                             | .83      |
| negative                                                                                                                                                                                                      | 184 (77)                        | 27 (75)                     |          |
| positive                                                                                                                                                                                                      | 54 (23)                         | 9 (25)                      |          |
| <i>WT1/ABL1</i> expression MRD, n (%)                                                                                                                                                                         |                                 |                             | .28      |
| negative                                                                                                                                                                                                      | 129 (75)                        | 21 (66)                     |          |
| positive                                                                                                                                                                                                      | 43 (25)                         | 11 (34)                     |          |
| FISH MRD, n (%)                                                                                                                                                                                               |                                 |                             | .39      |
| negative                                                                                                                                                                                                      | 106 (68)                        | 31 (61)                     |          |
| positive                                                                                                                                                                                                      | 50 (32)                         | 20 (39)                     |          |
| Abbreviations: <i>BAALC</i> , brain and acute leukemia, cytoplasmic; FISH, fluorescence in-situ hybridization; <i>MN1</i> , meningeoma-1; MRD, measurable residual disease; <i>WT1</i> , wilm's tumor gene 1. |                                 |                             |          |

## Supplementary Figures

### Supplementary Figure S1

#### ELN2017 risk distribution

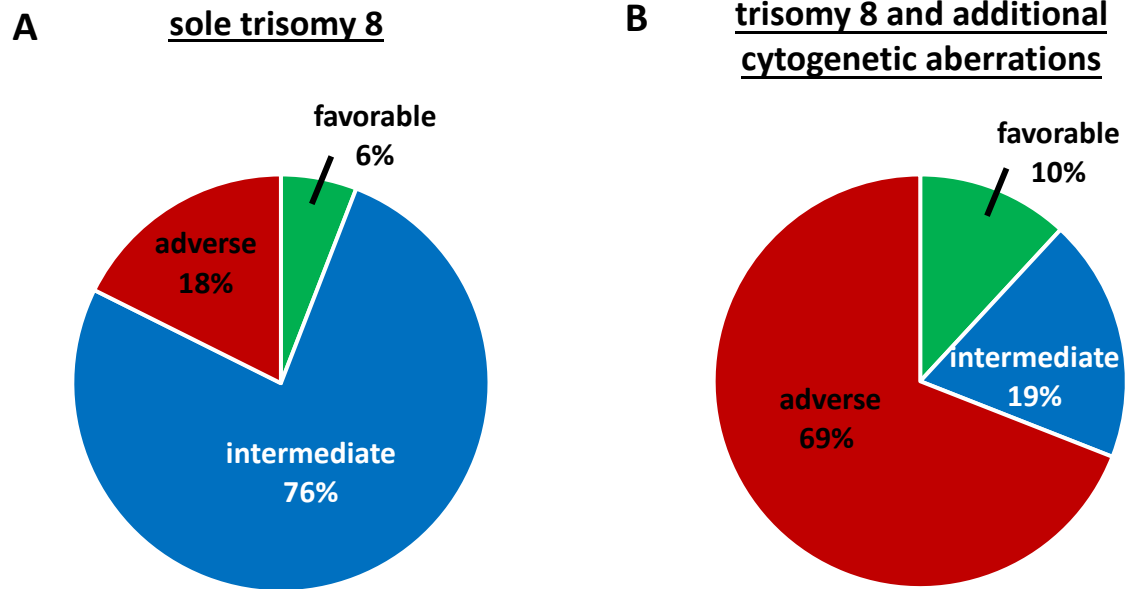

**Supplementary Figure S1.** ELN2017 risk distribution in AML patients with a trisomy 8 (**A**) without additional cytogenetic aberrations and (**B**) with additional cytogenetic aberrations at diagnosis.

Supplementary Figure S2

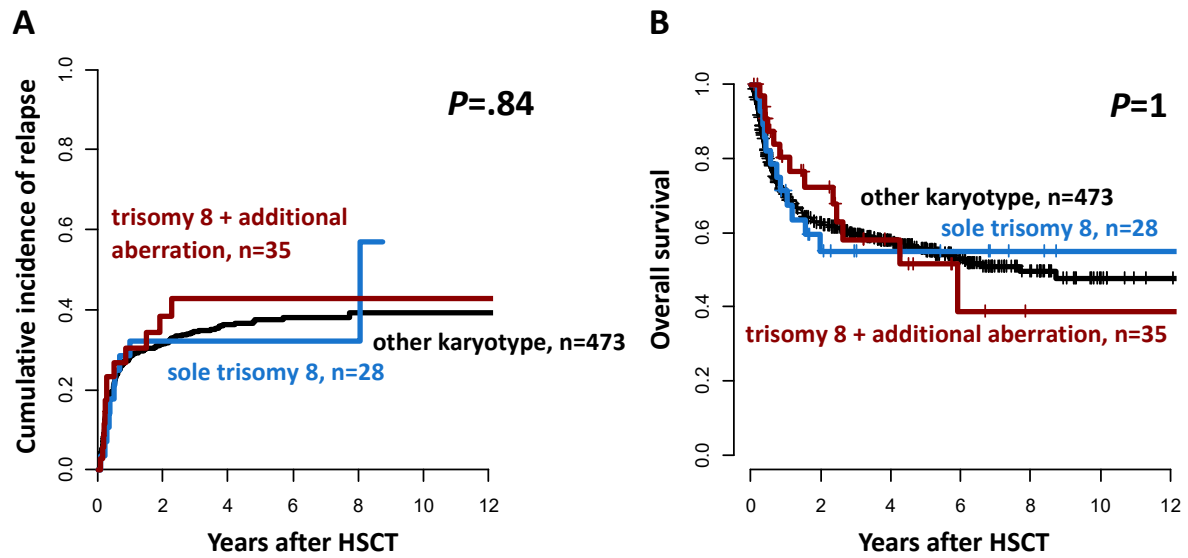

Supplementary Figure S2. Outcomes of AML patients undergoing allogeneic hematopoietic stem cell transplantation (HSCT) in morphologic remission according to the presence or absence of a trisomy 8 and additional cytogenetic aberrations (sole trisomy 8 vs trisomy 8 and additional cytogenetic aberration vs others, n=536). (A) Cumulative incidence of relapse/progression, and (B) Overall survival.

Supplementary Figure S3

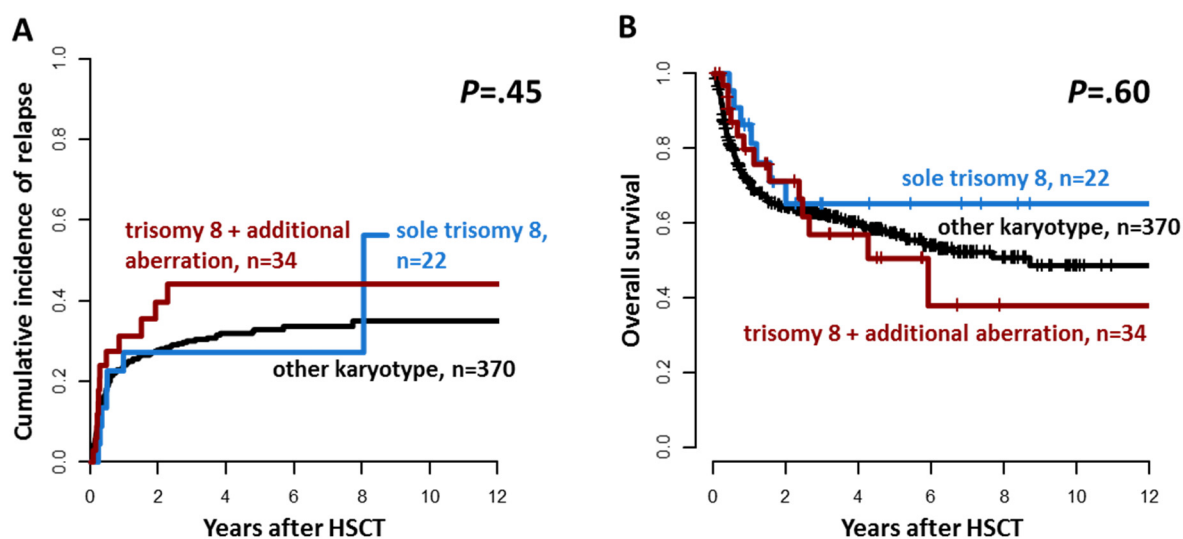

Supplementary Figure S3. Outcomes of AML patients undergoing allogeneic hematopoietic stem cell transplantation (HSCT) in first morphologic remission according to the presence or absence of a trisomy 8 and additional cytogenetic aberrations (sole trisomy 8 vs trisomy 8 and additional cytogenetic aberration vs others, n=426). (A) Cumulative incidence of relapse/progression, and (B) Overall survival.



# Supplementary Figure S4

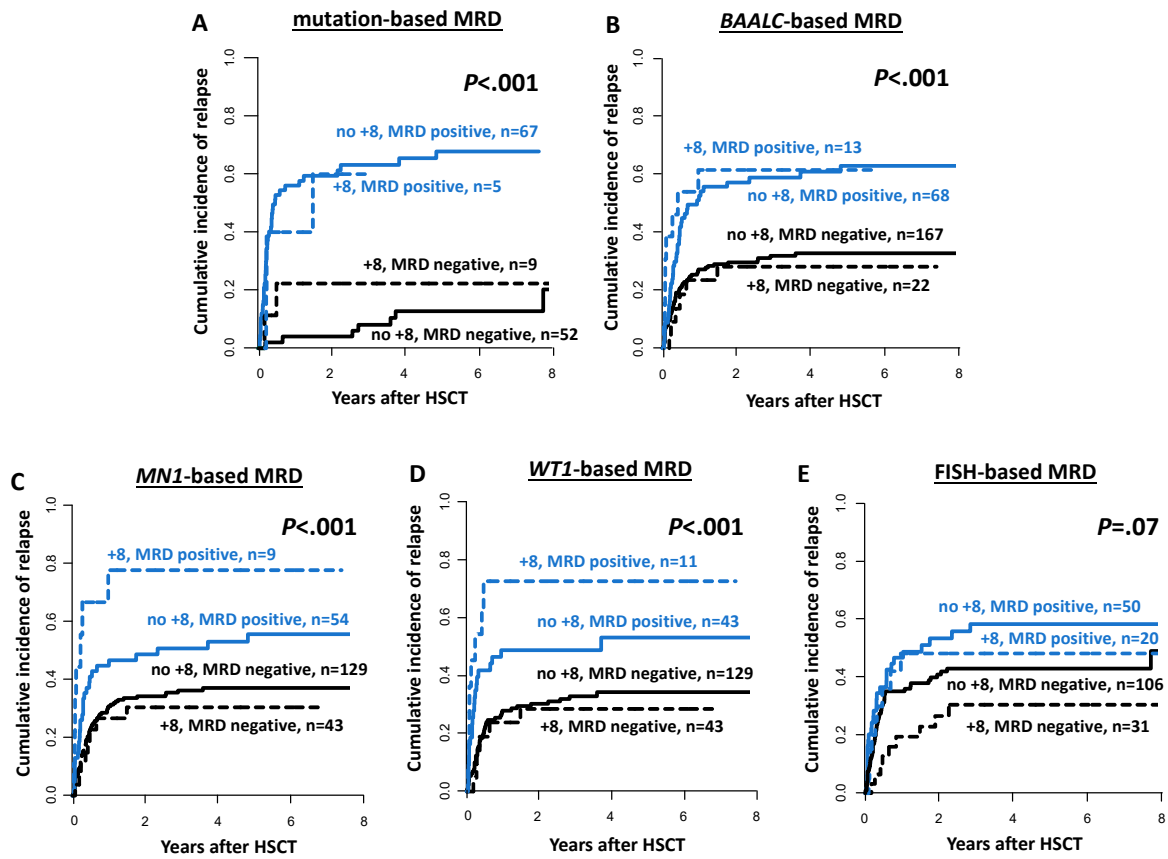

**Supplementary Figure S4. Cumulative incidence of relapse according to the status of the included MRD markers separately at allogeneic hematopoietic stem cell transplantation (HSCT) in AML patients with or without a trisomy 8. (A) mutation-based MRD ( $P$  for interaction =.40), (B) BAALC/*ABL1*-based MRD ( $P$  for interaction =.53), (C) MN1/*ABL1*-based MRD ( $P$  for interaction =.09), (D) WT1/*ABL1* ( $P$  for interaction =.17), and (E) FISH-based MRD ( $P$  for interaction =.80).  $P$ -values reflect the comparison of all displayed curves (overall  $P$ -values).**
